# Supplementary material for: The c-Abl inhibitor, Nilotinib, protects dopaminergic neurons in a preclinical animal model of Parkinson's disease
Source: PubMed Central journal article supplement — Sci Rep. 2014 May 2;4:4874. doi: 10.1038/srep04874 (PMC4007078; doi:10.1038/srep04874), 2014-05-02
Supplement: srep04874-s1.pdf [file srep04874-s1.pdf]

## Supplementary Information

for

### **The c-Abl inhibitor, Nilotinib, protects dopaminergic neurons in a preclinical animal model of Parkinson's disease.**

Senthilkumar S. Karuppagounder<sup>1,2,6</sup>, Saurav Brahmachari<sup>1,2,6</sup>, Yunjong Lee<sup>1,2,3,6</sup>, Valina L. Dawson<sup>1-3,5,6</sup>, Ted M. Dawson<sup>1,2,4-6\*</sup> and Han Seok Ko<sup>1,2,7\*</sup>

<sup>1</sup>Neuroregeneration and Stem Cell Programs, Institute for Cell Engineering, Departments of <sup>2</sup>Neurology, <sup>3</sup>Physiology, <sup>4</sup>Pharmacology and Molecular Sciences and <sup>5</sup>Solomon H. Snyder Department of Neuroscience, The Johns Hopkins University School of Medicine, Baltimore, MD 21205. USA.

<sup>6</sup>Adrienne Helis Malvin Medical Research Foundation, New Orleans, LA 70130-2685, USA

<sup>7</sup>Diana Helis Henry Medical Research Foundation, New Orleans, LA 70130-2685, USA

\*Both authors contributed equally and to who correspondence may be addressed:

Neuroregeneration and Stem Cell Programs  
Institute for Cell Engineering  
Johns Hopkins University School of Medicine  
733 North Broadway, Suite 731  
Baltimore, MD 21205  
Email: hko3@jhmi.edu or tdawson@jhmi.edu

Karuppagounder *et al.* Supplementary Figure S1

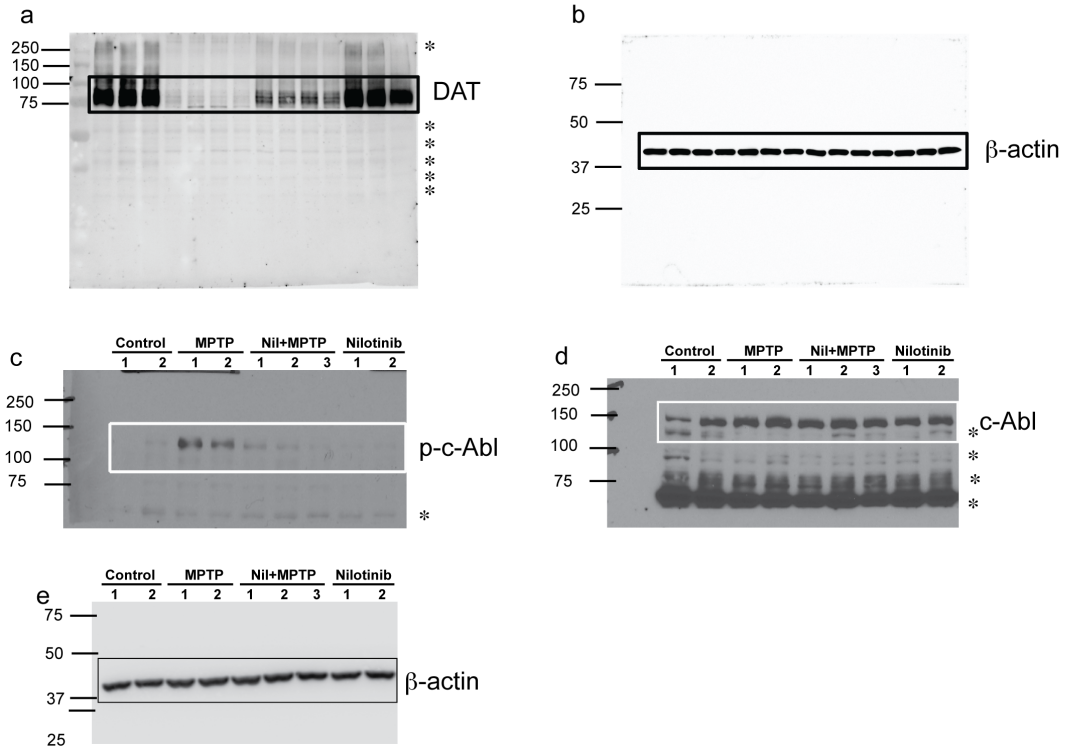

Supplementary Figure S1:

Full-length images of western blots scanned or obtained from chemidoc imaging system. Rectangular boxes indicate cropped regions used in the representative images. Full-length images of (a) DAT, (b)  $\beta$ -actin blots of Figure 2c ; (c) p-c-Abl, (d) c-Abl, and (e)  $\beta$ -actin blots of Figure 2e. \*Nonspecific bands

Karuppagounder *et al.* Supplementary Figure S2

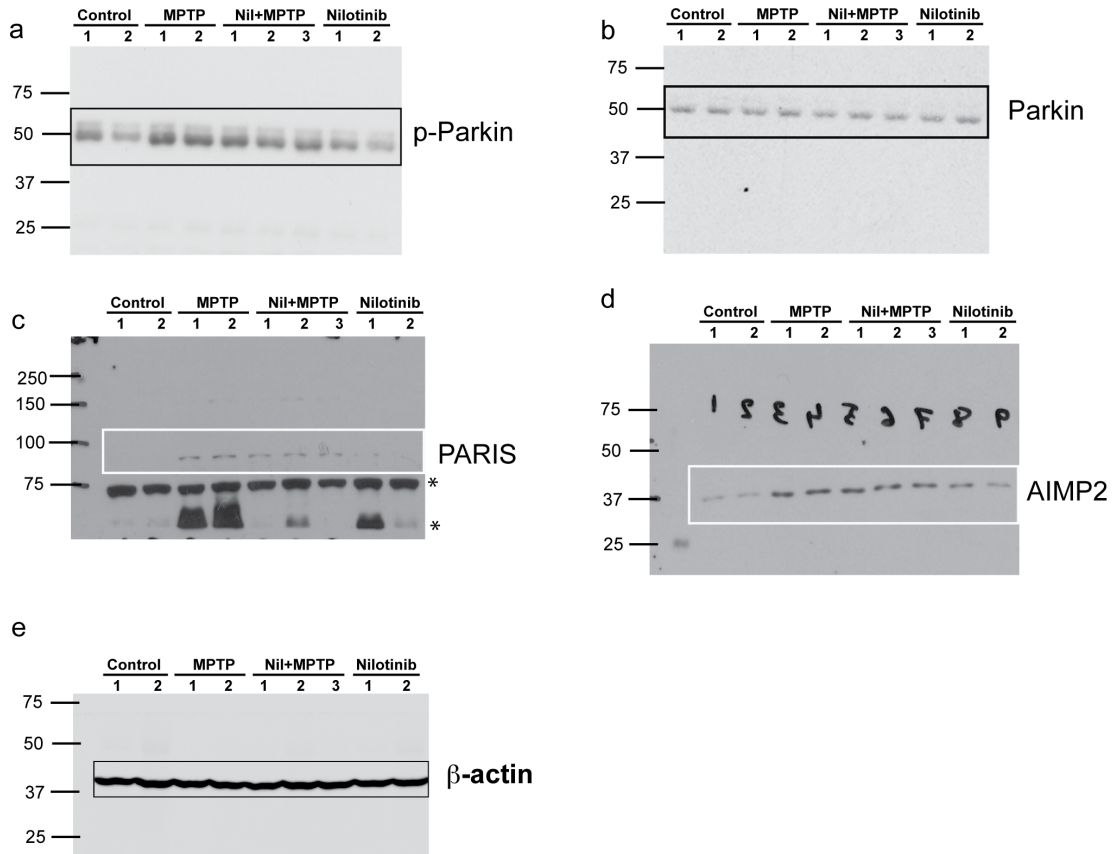

Supplementary Figure S2:

Full-length images of western blots scanned or obtained from chemidoc imaging system. Rectangular boxes indicate cropped regions used in the representative images. Full-length images of (a) p-Parkin, (b) Parkin, (c) PARIS, (d) AIMP2 and (e)  $\beta$ -actin blots of Figure 7a.

\*Nonspecific bands.
